# Supplementary material
Source: publisher figshare collection journal article supplement (https://wiley.figshare.com/articles/dataset/_/3564816)

# CHANGE IN DOMINANT SPECIES

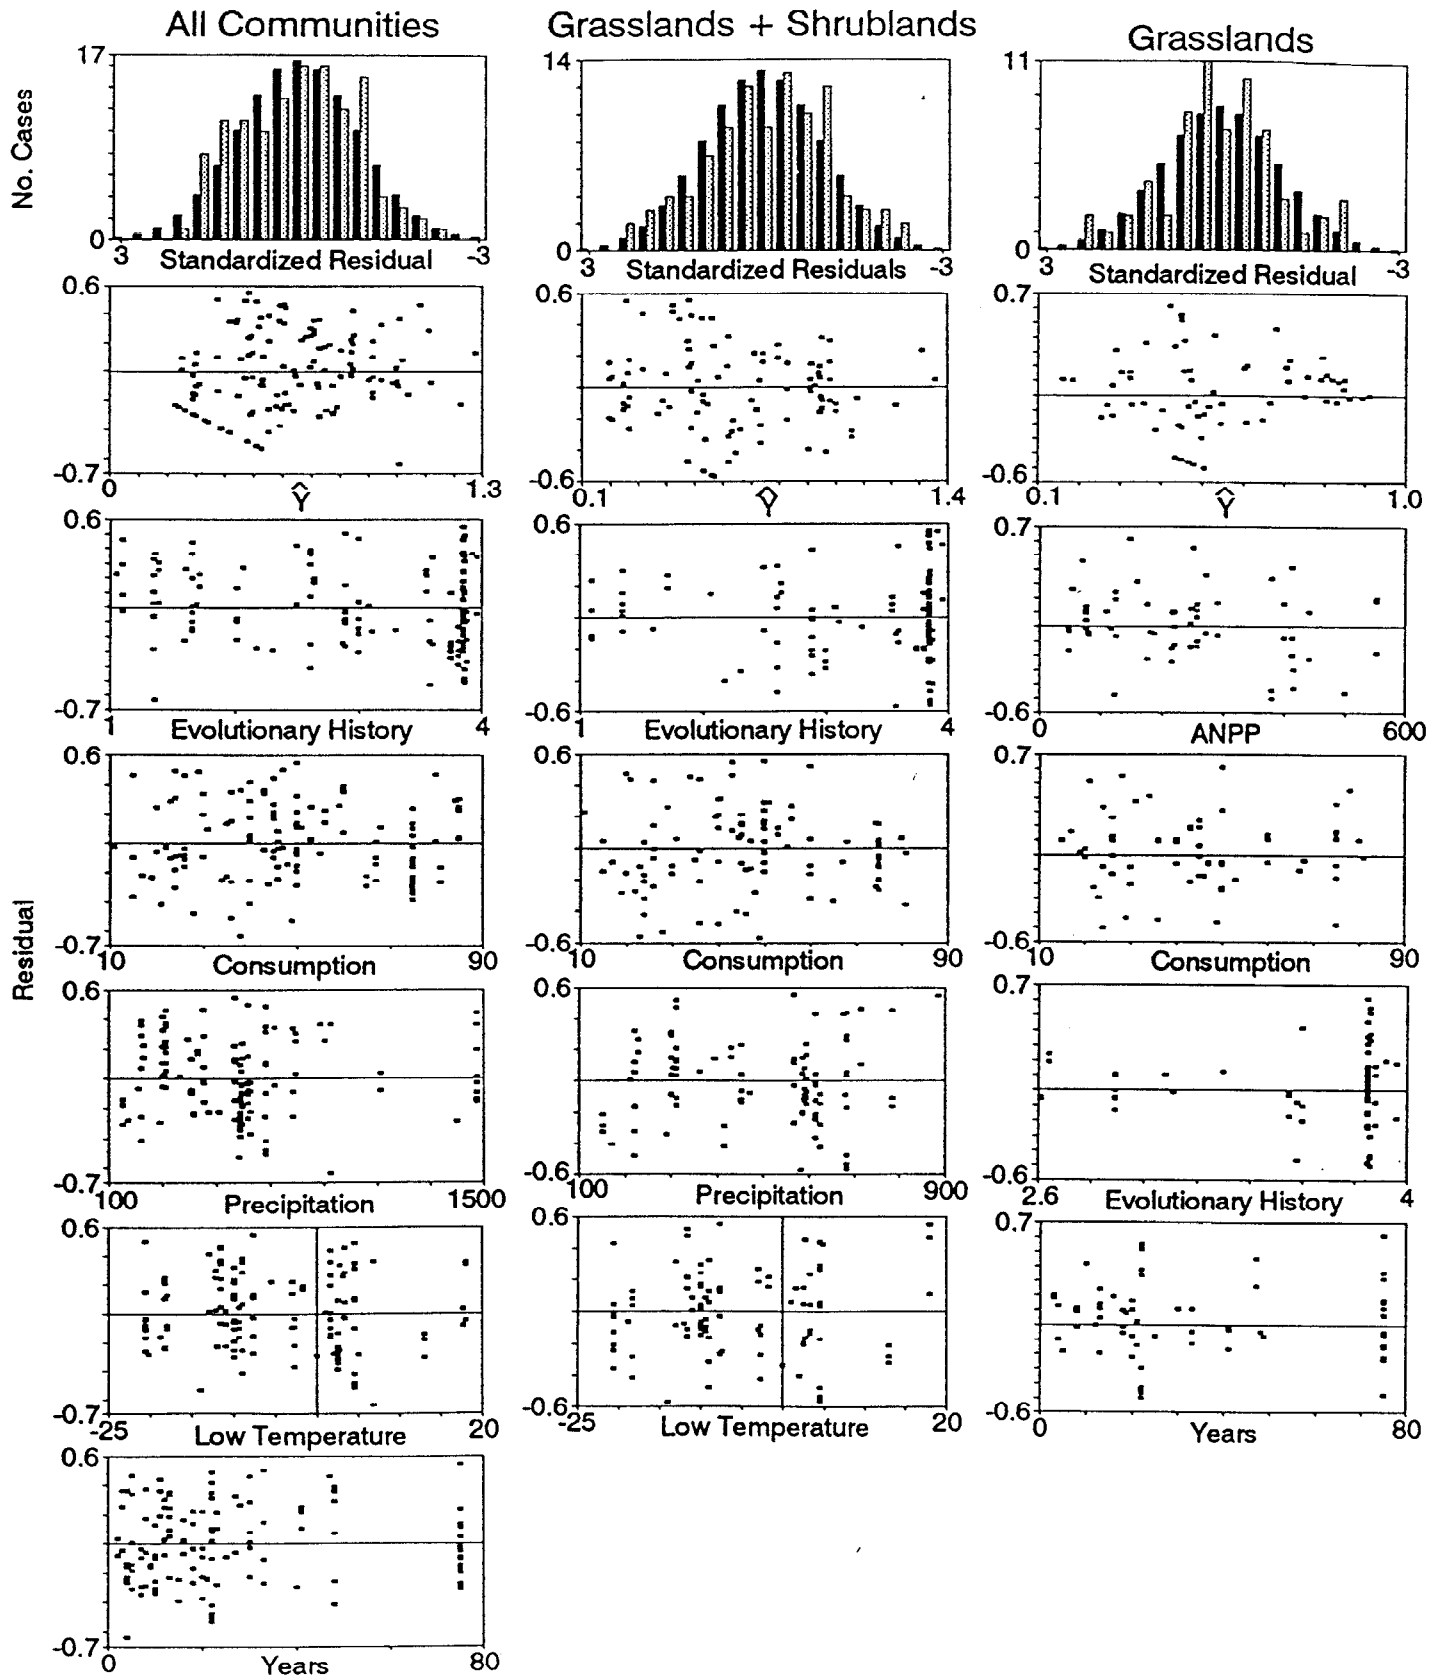

# SPECIES DISSIMILARITY

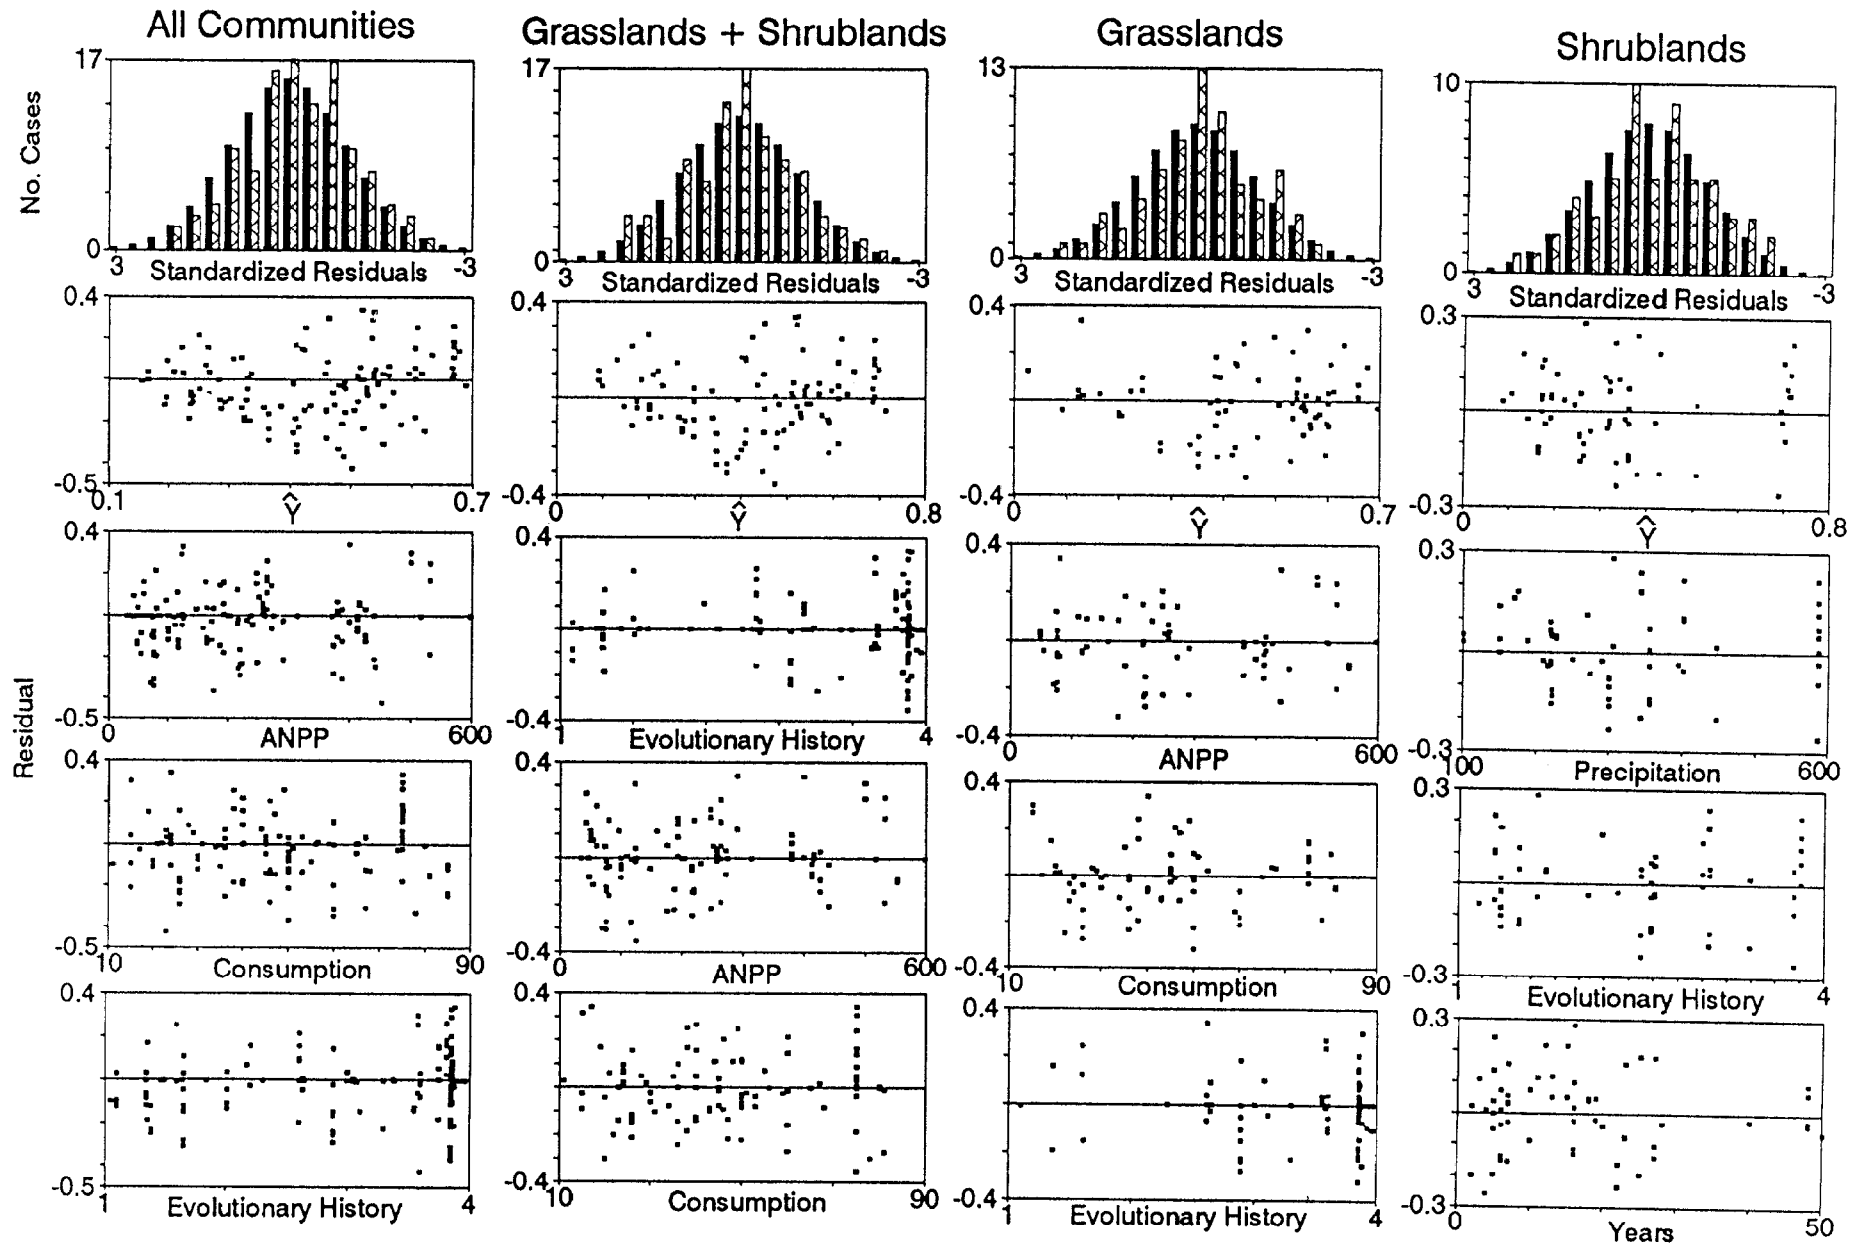

# CHANGE IN ANPP

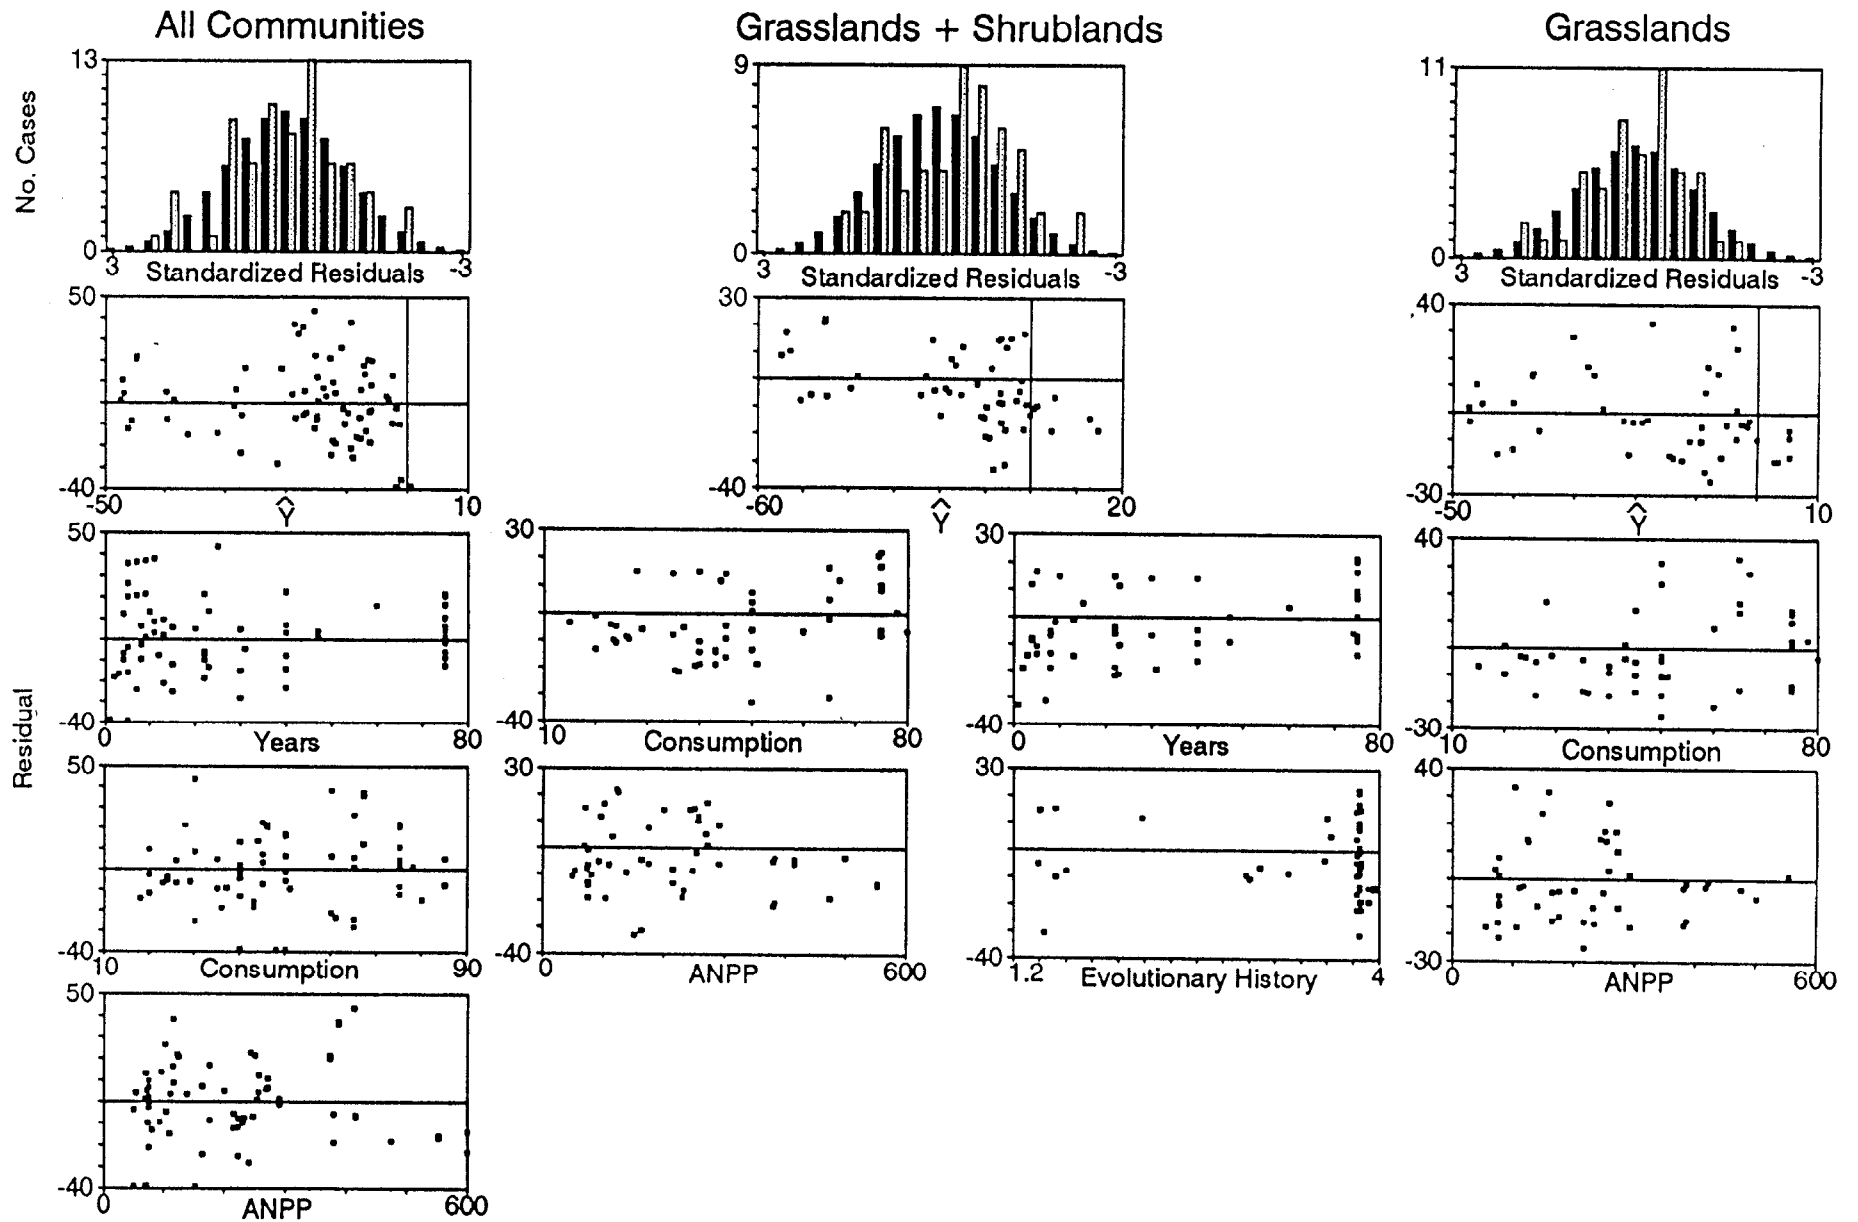

Supplement: Supplementary file 1 [file 1]
